# Supplementary material for: Gender Issues in Italian Catheterization Laboratories: The Gender‐CATH Study
Source: PubMed Central journal article supplement — J Am Heart Assoc. 2021 Feb 23;10(5):e017537. doi: 10.1161/JAHA.120.017537 (PMC8174252; doi:10.1161/jaha.120.017537), 2021-02-23
Supplement: JAH3-10-e017537-s001.pdf [file JAH3-10-e017537-s001.pdf]

# **Supplemental Material**

**Table S1. Gender CATH-Survey.**

**SECTION I. PERSONAL CHARACTERISTICS and TYPE of EMPLOYMENT (Q1-Q12)**

1) What age range do you belong?

- ≤ 30 years
- > 30-35 years
- 36-40 years
- 41-50 years
- >50 years
- >60 years
- 

2) What is your gender?

- Female
- Male

3) From how many years do you work in Cath-Lab?

- ≤ 1 years
- >1-≤ 3 years
- >3-≤ 5 years
- > 5 years
- >10 years

4) What is your current position in the Cath-Lab?

- Fellow in Cardiology
- Cardiologist structured with a permanent contract
- Cardiologist structured with a fixed-term contract
- Cardiologist with a professional relationship
- Cardiologist / scholarship holder

5) What kind of structure do you work in?

- Public Hospital
- Private Hospital agreement with the National Health System
- Private structure

6) Do you work in a university structure?

- Yes
- No

7) What is the region where you work?

Please report

8) Do you think that female sex can preclude or render more difficult the access in starting a fellowship in interventional cardiology?

- Yes
- No

- I do not know
- 9) How much the choice of becoming an interventional cardiologist did affect your private life on a scale of 1 to 10?  
Please report a number
- 10) What is your daily work commitment in Cath-Lab?
- < 8 h
  - 8-12 h
  - > 12 h
- 11) Do you perform clinical activity and “on call”?
- Yes
  - No
- 12) If yes, how much of your time is devoted to clinical activity?
- <30%
  - 31-50%
  - > 50%

**SECTION II. PRIVATE LIFE (Q 13-18).**

- 13) Do you have a partner?
- Yes
  - No
- 14) Does your partner work in the health sector (medical-nursing staff)?
- Yes
  - No
- 15) Is your partner an interventional cardiologist / cardiologist?
- Yes
  - No
- 16) Does your partner work in your facility and / or in your department?
- Yes
  - No
- 17) How many children do you have?
- 0
  - 1
  - >2
  - > 3

18) How much does your job in Cath-Lab affect the family management from a scale of 1 to 10?

Please report a number

19) At least one pregnancy occurred during the period of training in cardiology?

- Yes
- No

### **SECTION III. CATH-LAB ABSTENSION (Q19-Q27)**

20) Do you think that a period of abstention from the Cath-Lab for pregnancy / lactation negatively affects the possibilities of training and future intake?

- Yes
- No
- I do not know

21) If you were allowed, would you have continued to work or suggested to a woman to work in Cath-Lab during the period of pregnancy and breastfeeding?

- Yes, only during pregnancy
- Yes, only during breastfeeding
- Yes, in both periods
- No

22) Are you aware of the laws governing access to Cath-Lab during the period of pregnancy?

- Yes
- No
- I do not know

23) In the period of abstention from Cath-Lab, (for any reason pregnancy / illness / accident), what would you propose as activity / job task to best allocate your personal resources?

Express your opinion.

24) During abstention from Cath-Lab (for any reason pregnancy / illness / injury), do you think it is useful to perform PCI robotic simulation operations?

- Yes
- No

- I don't know

25) Do you think that it useful to participate in "Refresh skill" sessions during or after the period of abstention from the Cath-Lab (for any reason pregnancy / illness / accident),?

- Yes
- No
- I do not know

26) Do you think that the SICI-GISE scientific society should create both economic resources (e.g. grant scholarships) and training ("hand-on" sessions) to maintain skills in cases of abstention from Cath-Lab?

- Yes
- No
- I do not know

27) Do you think that greater protection and support of women by scientific societies could favour the choice of an interventional career for women?

- Yes
- No
- I do not know

#### **SECTION IV. RADIOEXPOSURE (Q28-Q38).**

28) Do you think that the radiation exposure counseling service provided by your work structure is sufficient?

- Yes
- No

29) Do you think that our scientific society should implement radiation protection counselling programs?

- Yes
- No
- I do not know

30) How much the current radiation protection counseling programs is specific to gender and age?

- Shortly
- Sufficiently

•Very

31) Are there awareness campaigns in your hospital to prevent infertility, reduce exposure to gonads and / or highly radiosensitive tissues such as the breast?

- Yes
- No
- I do not know

32) Do you think that it is necessary for the operators to have lead aprons with appropriate lateral protection of the breasts?

- Yes
- No
- I do not know

33) If yes, are there custom lead aprons available in your laboratory?

- Yes
- No
- I do not know

34) In your laboratory, do you have pelvis protection incorporated at the table?

- Yup
- No
- Yes, but we do not use them

35) Was the health physics service able to provide detailed information for women exposed in the first trimester of pregnancy?

- Yes
- No
- I do not know

36) What is the radiological dose limit of exposure to the fetus during the gestation period?

- 0.5 mSv
- 1.0 mSv
- 1.5 mSv
- there is no accepted limit

37) In the case of breastfeeding, was health physics able to provide information on radio exposure?

- Yes
- No
- I do not know

38) In case of breastfeeding, has your facility granted suitability for radio exposure?

- Yes
- No
- I do not know

#### **SECTION V. JOB'S DISCRIMINATIONS (Q39-46).**

39) Do you believe you have ever suffered discrimination in the workplace?

- Yes
- No
- I do not know

40) Do you feel that you have ever been discriminated against in future personal choices during the training / work experience?

- Yes
- No
- I do not know

41) Have you ever felt that you were subjected to any harassment in the workplace?

- Yes, during the training period
- Yes, during work activities
- No

42) Have you ever felt you were subjected to verbal harassment by chief or colleagues?

- Yes, during the training period
- Yes, during work activities
- No

43) Have you ever felt you were subjected to physical harassment?

- Yes, during the training period
- Yes, during work activities

- No

44) In case you have suffered verbal and / or physical harassment, these have taken place by:

- your manager
- your parigrade
- other

45) Do you believe that being a woman could be a discriminating factor for career purposes?

- No
- Yes, being a woman creates more difficulty in career advancement
- Yes, being a woman creates less difficulty in career advancement

46) Do you believe that being a woman can be discriminatory for the purposes of work compensation?

- No
- Yes
- I do not know
